# Supplementary material for: Kangaroo mother care for preterm or low birth weight infants: a systematic review and meta-analysis
Source: PubMed Central journal article supplement — BMJ Glob Health. 2023 May 8;8(6):e010728. doi: 10.1136/bmjgh-2022-010728 (PMC10254798; doi:10.1136/bmjgh-2022-010728), 2023-05-08
Supplement: bmjgh-2022-010728supp002.pdf [file bmjgh-2022-010728supp002.pdf]

**Kangaroo mother care for preterm or low birth weight infants: A  
systematic review and meta-analysis**

**Supplement 2: eTables and eFigures**

**eTable 1: Birth weight and gestational age of enrolled neonates in the included studies for the primary outcome of mortality during birth hospitalization/28 days**

| KMC vs conventional care |             |                                                 |                                                 |                               |                                 |
|--------------------------|-------------|-------------------------------------------------|-------------------------------------------------|-------------------------------|---------------------------------|
| S No                     | Author      | Mean GA category assigned for subgroup analysis | Mean BW category assigned for subgroup analysis | Mean/median GA at birth weeks | Mean/median BW grams            |
| 1                        | Acharya     | <34                                             | ≤2000                                           | 32.22± 2.4 and 32.54± 1.87    |                                 |
| 2                        | Boo         | <34                                             | ≤2000                                           |                               |                                 |
| 3                        | Cattaneo    | <34                                             | ≤2000                                           | 33.7 (2.5)                    | 1622 (239)                      |
| 4                        | Charpak     | <34                                             | ≤2000                                           | 33.6 ( 2.5)                   | 1705 (261)                      |
| 5                        | Eka Pratiwi | ≥34                                             | >2000                                           | 35.6 (2.2)                    | 2033 (159)                      |
| 6                        | Ghavane     | <34                                             | ≤2000                                           | 30.8 ( 2.1)                   | 1170 (191)                      |
| 7                        | Kadam       | <34                                             | ≤2000                                           | 33.3 ( 2.1)                   | 1467 ( 228)                     |
| 8                        | Mazumdar    | ≥34                                             | >2000                                           |                               | 1.5 to 2.25 (73% were 2-2.25kg) |
| 9                        | Mwenda      | <34                                             | ≤2000                                           | 32.7 (range 28-36)            | 1514 (range 1000-1900)          |
| 10                       | Rojas       | <34                                             | ≤2000                                           | 26.6 (2.3)                    | 906 (245)                       |
| 11                       | Suman       | ≥34                                             | ≤2000                                           | 32.7 (28-36)                  | 1683.4 (235)                    |
| 12                       | Worku       | <34                                             | ≤2000                                           | 31.59                         | 1514.83                         |

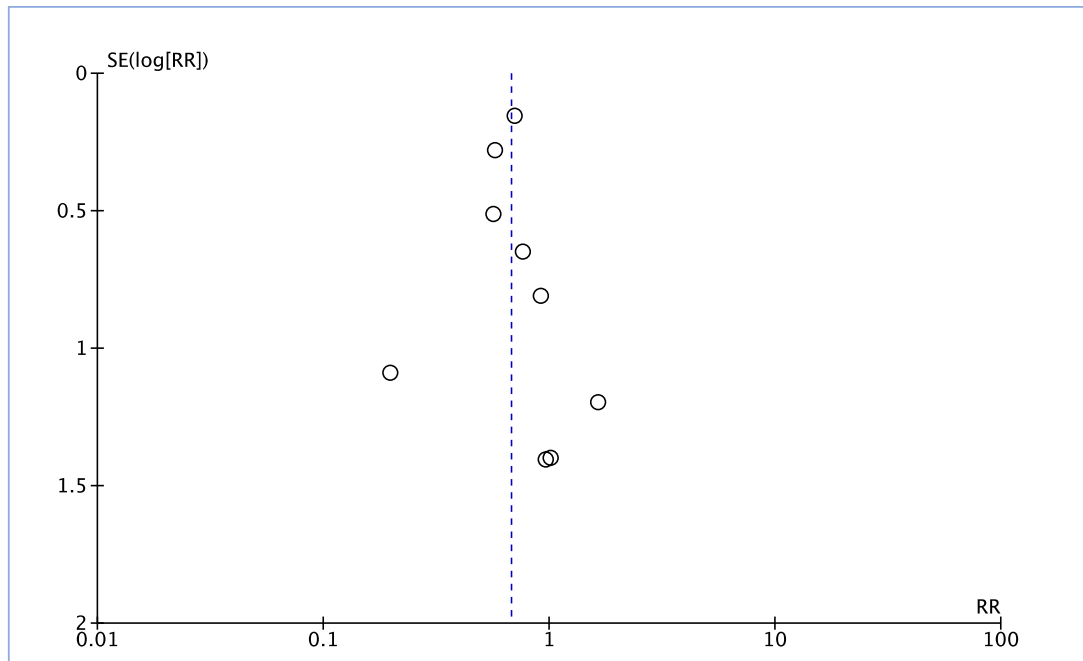

**eFigure 1: KMC vs. conventional care - funnel plot for ‘mortality during birth hospitalization/28 days of life**

*SE, standard error; RR, relative risk*

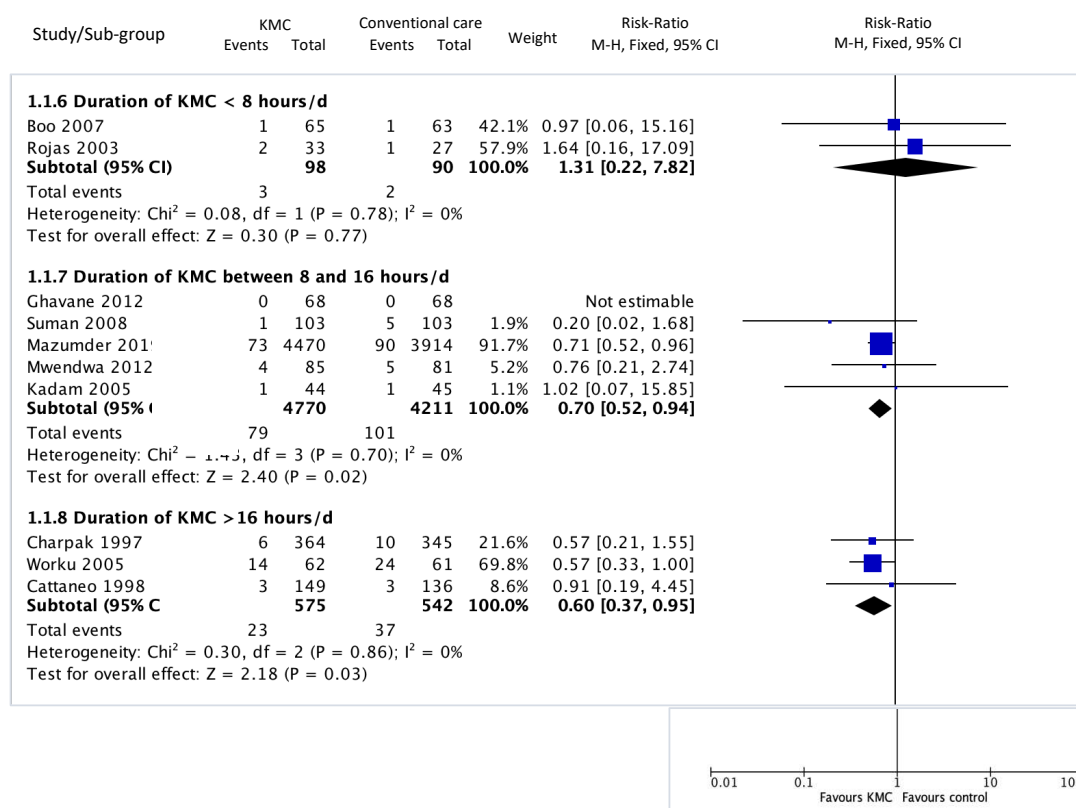

**Figure 2: KMC vs. conventional care - mortality at birth hospitalization/28 days of life**  
(Subgroup analysis by the duration of KMC achieved in the studies)

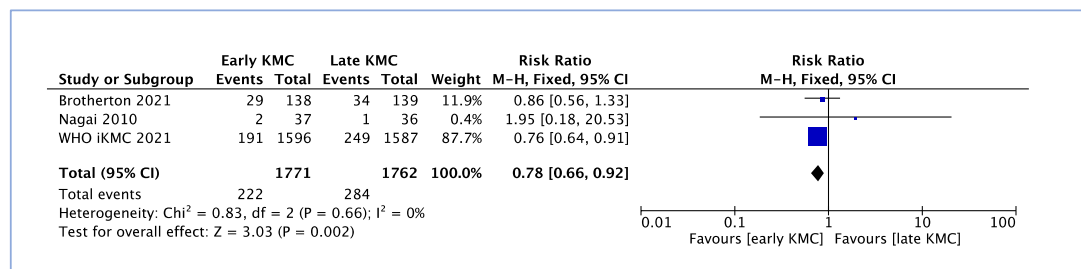

**eFigure 3: Early-initiated vs. late-initiated KMC: mortality by 28 days of life**
